# Supplementary material for: Impact of change in erosion rate and landscape steepness on hillslope and fluvial sediments grain size in the Feather River basin (Sierra Nevada, California)
Source: Copernicus journal article supplement (doi:10.5194/esurf-3-201-2015), 2015-03-25
Supplement: Supplementary file 1 [file Data_RiverSedimentGSD_FeatherRiver_Attal2015.xlsx]

## Sheet: BC1
Site BC1						Fraction > 10 mm sieved in the field; fragments larger than 80 mm weighed individually.
Bean Creek						Fraction < 10 mm sampled (~1-2 kg).
Easting	Northing					Fraction 1-10 mm sieved in the lab.
643400	4386140					Fraction < 1 mm characterised using a Malvern laser grain size analyser.
Total sample mass = 114.2 kg
Cumulative grain size data
Grain size
mm	-phi	% mass finer than…
211.389	7.72376	1
139.933	7.12859	0.885271
136.923	7.09722	0.851991
129.33	7.01491	0.820813
128.753	7.00846	0.79454
121.704	6.92723	0.768616
114.467	6.83879	0.746721
114.099	6.83414	0.728505
114.099	6.83414	0.710464
112.98	6.81992	0.692422
107.855	6.75295	0.674907
106.176	6.73032	0.659668
100.315	6.6484	0.64513
98.8614	6.62734	0.632869
97.8678	6.61276	0.621133
97.3633	6.60531	0.609748
96.3383	6.59004	0.598538
94.2203	6.55797	0.587678
92.0025	6.5236	0.577519
91.4311	6.51461	0.56806
90.2662	6.49611	0.558777
89.0705	6.47688	0.549844
85.2756	6.41406	0.541261
83.9324	6.39116	0.533729
83.9324	6.39116	0.526548
83.2444	6.37928	0.519366
83.2444	6.37928	0.51236
81.109	6.34179	0.505354
80.3716	6.32861	0.498873
80	6.32193	0.492567
40	5.32193	0.358921
20	4.32193	0.258205
10	3.32193	0.203556
8	3	0.190921
5.6	2.48543	0.165856
4	2	0.140837
2	1	0.0826412
1.4	0.485427	0.0636997
1	0	0.0497849
0.961542	-0.0565784	0.0497849
0.851056	-0.232675	0.0479419
0.753265	-0.408771	0.0453285
0.666711	-0.584868	0.0423269
0.590102	-0.760964	0.0390907
0.522296	-0.93706	0.035717
0.462281	-1.11316	0.0323252
0.409163	-1.28925	0.0290264
0.362148	-1.46535	0.0259122
0.320535	-1.64145	0.0230498
0.283704	-1.81754	0.0204802
0.251105	-1.99364	0.0182193
0.222251	-2.16974	0.0162625
0.196714	-2.34583	0.0145906
0.17411	-2.52193	0.013173
0.154104	-2.69802	0.0119731
0.136397	-2.87412	0.0109537
0.120724	-3.05022	0.0100792
0.106852	-3.22631	0.00931838
0.0945742	-3.40241	0.00864515
0.0837071	-3.57851	0.00803861
0.0740887	-3.7546	0.00748229
0.0655755	-3.9307	0.00696399
0.0580405	-4.1068	0.00647464
0.0513714	-4.28289	0.00600771
0.0454685	-4.45899	0.00555894
0.0402439	-4.63508	0.00512606
0.0356197	-4.81118	0.00470833
0.0315268	-4.98728	0.00430646
0.0279042	-5.16337	0.00392206
0.0246979	-5.33947	0.00355718
0.0218599	-5.51557	0.00321387
0.0193481	-5.69166	0.00289397
0.0171249	-5.86776	0.00259838
0.0151572	-6.04386	0.00232738
0.0134155	-6.21995	0.00208057
0.011874	-6.39605	0.00185688
0.0105096	-6.57215	0.00165474
0.00930201	-6.74824	0.00147237
0.00823316	-6.92434	0.00130763
0.00728712	-7.10043	0.00115849
0.0064498	-7.27653	0.00102309
0.00570868	-7.45263	0.000899818
0.00505272	-7.62872	0.000787369
0.00447214	-7.80482	0.000684801
0.00395826	-7.98092	0.000591416
0.00350344	-8.15701	0.000506781
0.00310087	-8.33311	0.00043067
0.00274457	-8.50921	0.000362968
0.0024292	-8.6853	0.000303583
0.00215007	-8.8614	0.000252187
0.00190302	-9.0375	0.000208363
0.00168435	-9.21359	0.000171327
0.00149081	-9.38969	0.000137639
0.00131951	-9.56578	0.000113273
0.00116789	-9.74188	9.3264e-05
0.00103369	-9.91798	7.35651e-05
0.000914916	-10.0941	5.29975e-05
0.000809787	-10.2702	3.28326e-05
0.000716738	-10.4463	1.16148e-05
0.000634381	-10.6224	0
0.000561487	-10.7985	0
0.000496969	-10.9746	0
0.000439865	-11.1507	0
0.000389322	-11.3267	0
0.000344587	-11.5028	0

## Sheet: BC2
Site BC2						Fraction > 10 mm sieved in the field; fragments larger than 80 mm weighed individually.
Bean Creek						Fraction < 10 mm sampled (~1-2 kg).
Easting	Northing					Fraction 1-10 mm sieved in the lab.
643425	4386220					Fraction < 1 mm characterised using a Malvern laser grain size analyser.
Total sample mass = 118.1 kg
Cumulative grain size data
Grain size
mm	-phi	% mass finer than…
210.958	7.72081	1
171.537	7.42238	0.889723
165.792	7.37323	0.830434
125.48	6.97132	0.776905
121.052	6.91948	0.753698
108.267	6.75845	0.732862
107.441	6.74739	0.717955
107.022	6.74177	0.703387
105.317	6.71859	0.688988
104.881	6.71262	0.675267
100.791	6.65522	0.661715
96.8535	6.59773	0.649688
94.7587	6.56619	0.639016
89.0705	6.47688	0.629022
88.4604	6.46696	0.620721
87.2143	6.44649	0.61259
86.5777	6.43592	0.604798
86.5777	6.43592	0.597175
83.9324	6.39116	0.589552
81.109	6.34179	0.582607
80.3716	6.32861	0.576339
80	6.32193	0.570241
40	5.32193	0.367135
20	4.32193	0.268885
10	3.32193	0.207902
8	3	0.200397
5.6	2.48543	0.184053
4	2	0.162426
2	1	0.109972
1.4	0.485427	0.0803457
1	0	0.0559865
0.961542	-0.0565784	0.0559865
0.851056	-0.232675	0.0524512
0.753265	-0.408771	0.0476409
0.666711	-0.584868	0.0424482
0.590102	-0.760964	0.0372325
0.522296	-0.93706	0.0322258
0.462281	-1.11316	0.0276452
0.409163	-1.28925	0.0236421
0.362148	-1.46535	0.0202856
0.320535	-1.64145	0.0175736
0.283704	-1.81754	0.0154474
0.251105	-1.99364	0.013811
0.222251	-2.16974	0.0125526
0.196714	-2.34583	0.0115638
0.17411	-2.52193	0.0107501
0.154104	-2.69802	0.0100391
0.136397	-2.87412	0.00938328
0.120724	-3.05022	0.0087565
0.106852	-3.22631	0.008149
0.0945742	-3.40241	0.00756178
0.0837071	-3.57851	0.00700119
0.0740887	-3.7546	0.00647397
0.0655755	-3.9307	0.00598446
0.0580405	-4.1068	0.00553337
0.0513714	-4.28289	0.005118
0.0454685	-4.45899	0.0047333
0.0402439	-4.63508	0.0043733
0.0356197	-4.81118	0.00403216
0.0315268	-4.98728	0.00370567
0.0279042	-5.16337	0.0033914
0.0246979	-5.33947	0.00308873
0.0218599	-5.51557	0.00279846
0.0193481	-5.69166	0.00252237
0.0171249	-5.86776	0.0022623
0.0151572	-6.04386	0.0020199
0.0134155	-6.21995	0.00179626
0.011874	-6.39605	0.00159169
0.0105096	-6.57215	0.00140573
0.00930201	-6.74824	0.00123736
0.00823316	-6.92434	0.00108492
0.00728712	-7.10043	0.000946616
0.0064498	-7.27653	0.000820677
0.00570868	-7.45263	0.000705531
0.00505272	-7.62872	0.000599926
0.00447214	-7.80482	0.000503014
0.00395826	-7.98092	0.000414236
0.00350344	-8.15701	0.000333339
0.00310087	-8.33311	0.000260304
0.00274457	-8.50921	0.000195109
0.0024292	-8.6853	0.000138133
0.00215007	-8.8614	8.83708e-05
0.00190302	-9.0375	4.64302e-05
0.00168435	-9.21359	1.95667e-05
0.00149081	-9.38969	4.10661e-06
0.00131951	-9.56578	0
0.00116789	-9.74188	0
0.00103369	-9.91798	0
0.000914916	-10.0941	0
0.000809787	-10.2702	0
0.000716738	-10.4463	0
0.000634381	-10.6224	0
0.000561487	-10.7985	0
0.000496969	-10.9746	0
0.000439865	-11.1507	0
0.000389322	-11.3267	0
0.000344587	-11.5028	0

## Sheet: BC3
Site BC3						Fraction > 10 mm sieved in the field; fragments larger than 80 mm weighed individually.
Bean Creek						Fraction < 10 mm sampled (~1-2 kg).
Easting	Northing					Fraction 1-10 mm sieved in the lab.
643535	4387220					Fraction < 1 mm characterised using a Malvern laser grain size analyser.
Total sample mass = 44.6 kg
Cumulative grain size data
Grain size
mm	-phi	% mass finer than…
96.8535	6.59773	1
90.8524	6.50545	0.97173
86.5777	6.43592	0.948396
83.2444	6.37928	0.928203
81.109	6.34179	0.910254
80	6.32193	0.89365
40	5.32193	0.644604
20	4.32193	0.453893
10	3.32193	0.337222
8	3	0.325594
5.6	2.48543	0.290274
4	2	0.251748
2	1	0.145191
1.4	0.485427	0.0899839
1	0	0.0560226
0.961542	-0.0565784	0.0560226
0.851056	-0.232675	0.0518613
0.753265	-0.408771	0.046271
0.666711	-0.584868	0.0403405
0.590102	-0.760964	0.0344816
0.522296	-0.93706	0.0289502
0.462281	-1.11316	0.023972
0.409163	-1.28925	0.0196929
0.362148	-1.46535	0.0161662
0.320535	-1.64145	0.0133696
0.283704	-1.81754	0.0112241
0.251105	-1.99364	0.0096157
0.222251	-2.16974	0.00841867
0.196714	-2.34583	0.00751472
0.17411	-2.52193	0.00680304
0.154104	-2.69802	0.00620803
0.136397	-2.87412	0.00568078
0.120724	-3.05022	0.00519445
0.106852	-3.22631	0.00473851
0.0945742	-3.40241	0.00431271
0.0837071	-3.57851	0.00392149
0.0740887	-3.7546	0.00356925
0.0655755	-3.9307	0.0032579
0.0580405	-4.1068	0.00298577
0.0513714	-4.28289	0.00274807
0.0454685	-4.45899	0.00253798
0.0402439	-4.63508	0.00234802
0.0356197	-4.81118	0.00217128
0.0315268	-4.98728	0.00200261
0.0279042	-5.16337	0.00183883
0.0246979	-5.33947	0.00167872
0.0218599	-5.51557	0.00152257
0.0193481	-5.69166	0.00137172
0.0171249	-5.86776	0.00122783
0.0151572	-6.04386	0.00109249
0.0134155	-6.21995	0.000966831
0.011874	-6.39605	0.000851416
0.0105096	-6.57215	0.00074616
0.00930201	-6.74824	0.000650505
0.00823316	-6.92434	0.000563447
0.00728712	-7.10043	0.000483854
0.0064498	-7.27653	0.000410638
0.00570868	-7.45263	0.0003429
0.00505272	-7.62872	0.000280011
0.00447214	-7.80482	0.0002217
0.00395826	-7.98092	0.000167825
0.00350344	-8.15701	0.000118557
0.00310087	-8.33311	7.43235e-05
0.00274457	-8.50921	3.30214e-05
0.0024292	-8.6853	5.8101e-06
0.00215007	-8.8614	0
0.00190302	-9.0375	0
0.00168435	-9.21359	0
0.00149081	-9.38969	0
0.00131951	-9.56578	0
0.00116789	-9.74188	0
0.00103369	-9.91798	0
0.000914916	-10.0941	0
0.000809787	-10.2702	0
0.000716738	-10.4463	0
0.000634381	-10.6224	0
0.000561487	-10.7985	0
0.000496969	-10.9746	0
0.000439865	-11.1507	0
0.000389322	-11.3267	0
0.000344587	-11.5028	0

## Sheet: BC4
Site BC4						Fraction > 10 mm sieved in the field; fragments larger than 80 mm weighed individually.
Bean Creek						Fraction < 10 mm sampled (~1-2 kg).
Easting	Northing					Fraction 1-10 mm sieved in the lab.
643500	4387200					Fraction < 1 mm characterised using a Malvern laser grain size analyser.
Total sample mass = 61.5 kg
Cumulative grain size data
Grain size
mm	-phi	% mass finer than…
163.307	7.35144	1
116.273	6.86137	0.90176
107.441	6.74739	0.866302
98.3671	6.6201	0.838326
97.3633	6.60531	0.816857
95.8176	6.58222	0.796038
93.6757	6.5496	0.776194
93.1246	6.54109	0.757652
91.4311	6.51461	0.739436
89.6724	6.48659	0.722195
85.2756	6.41406	0.70593
81.8332	6.35462	0.691942
80	6.32193	0.679581
40	5.32193	0.380631
20	4.32193	0.285969
10	3.32193	0.22156
8	3	0.214201
5.6	2.48543	0.196986
4	2	0.170514
2	1	0.101453
1.4	0.485427	0.0645919
1	0	0.0399179
0.961542	-0.0565784	0.0399179
0.851056	-0.232675	0.0382385
0.753265	-0.408771	0.0359112
0.666711	-0.584868	0.0333264
0.590102	-0.760964	0.0306404
0.522296	-0.93706	0.027953
0.462281	-1.11316	0.0253688
0.409163	-1.28925	0.022972
0.362148	-1.46535	0.0208166
0.320535	-1.64145	0.0189278
0.283704	-1.81754	0.0173042
0.251105	-1.99364	0.015924
0.222251	-2.16974	0.0147528
0.196714	-2.34583	0.0137514
0.17411	-2.52193	0.0128808
0.154104	-2.69802	0.0121065
0.136397	-2.87412	0.0114012
0.120724	-3.05022	0.0107453
0.106852	-3.22631	0.0101254
0.0945742	-3.40241	0.00953388
0.0837071	-3.57851	0.00896648
0.0740887	-3.7546	0.00842057
0.0655755	-3.9307	0.00789408
0.0580405	-4.1068	0.00738488
0.0513714	-4.28289	0.00689084
0.0454685	-4.45899	0.00641024
0.0402439	-4.63508	0.00594232
0.0356197	-4.81118	0.00548749
0.0315268	-4.98728	0.0050475
0.0279042	-5.16337	0.00462508
0.0246979	-5.33947	0.00422345
0.0218599	-5.51557	0.0038457
0.0193481	-5.69166	0.00349445
0.0171249	-5.86776	0.00317093
0.0151572	-6.04386	0.00287535
0.0134155	-6.21995	0.00260682
0.011874	-6.39605	0.00236355
0.0105096	-6.57215	0.00214306
0.00930201	-6.74824	0.00194267
0.00823316	-6.92434	0.00175947
0.00728712	-7.10043	0.00159085
0.0064498	-7.27653	0.00143463
0.00570868	-7.45263	0.00128913
0.00505272	-7.62872	0.00115324
0.00447214	-7.80482	0.00102644
0.00395826	-7.98092	0.000908554
0.00350344	-8.15701	0.000799742
0.00310087	-8.33311	0.000700347
0.00274457	-8.50921	0.000610757
0.0024292	-8.6853	0.000531202
0.00215007	-8.8614	0.000461648
0.00190302	-9.0375	0.0004016
0.00168435	-9.21359	0.000349884
0.00149081	-9.38969	0.000304547
0.00131951	-9.56578	0.000263057
0.00116789	-9.74188	0.000222951
0.00103369	-9.91798	0.000182417
0.000914916	-10.0941	0.000140889
0.000809787	-10.2702	9.97589e-05
0.000716738	-10.4463	5.99148e-05
0.000634381	-10.6224	2.50289e-05
0.000561487	-10.7985	0
0.000496969	-10.9746	0
0.000439865	-11.1507	0
0.000389322	-11.3267	0
0.000344587	-11.5028	0

## Sheet: BC5
Site BC5						Fraction > 10 mm sieved in the field; fragments larger than 80 mm weighed individually.
Bean Creek						Fraction < 10 mm sampled (~1-2 kg).
Easting	Northing					Fraction 1-10 mm sieved in the lab.
643405	4387800					Fraction < 1 mm characterised using a Malvern laser grain size analyser.
Total sample mass = 36.9 kg
Cumulative grain size data
Grain size
mm	-phi	% mass finer than…
132.417	7.04894	1
113.728	6.82945	0.912697
111.065	6.79526	0.857387
101.262	6.66195	0.805873
100.315	6.6484	0.766831
94.2203	6.55797	0.728874
80	6.32193	0.697423
40	5.32193	0.48486
20	4.32193	0.413282
10	3.32193	0.319473
8	3	0.303828
5.6	2.48543	0.27827
4	2	0.242411
2	1	0.161945
1.4	0.485427	0.118889
1	0	0.0903574
0.961542	-0.0565784	0.0903574
0.851056	-0.232675	0.0861094
0.753265	-0.408771	0.0802766
0.666711	-0.584868	0.0738717
0.590102	-0.760964	0.0672751
0.522296	-0.93706	0.0607184
0.462281	-1.11316	0.0544357
0.409163	-1.28925	0.048609
0.362148	-1.46535	0.0433523
0.320535	-1.64145	0.0387187
0.283704	-1.81754	0.0347089
0.251105	-1.99364	0.0312842
0.222251	-2.16974	0.028381
0.196714	-2.34583	0.0259254
0.17411	-2.52193	0.0238399
0.154104	-2.69802	0.0220502
0.136397	-2.87412	0.0204915
0.120724	-3.05022	0.0191086
0.106852	-3.22631	0.0178558
0.0945742	-3.40241	0.016697
0.0837071	-3.57851	0.0156041
0.0740887	-3.7546	0.0145564
0.0655755	-3.9307	0.0135395
0.0580405	-4.1068	0.0125455
0.0513714	-4.28289	0.0115716
0.0454685	-4.45899	0.0106198
0.0402439	-4.63508	0.00969626
0.0356197	-4.81118	0.00880885
0.0315268	-4.98728	0.00796628
0.0279042	-5.16337	0.00717638
0.0246979	-5.33947	0.00644506
0.0218599	-5.51557	0.00577559
0.0193481	-5.69166	0.00516885
0.0171249	-5.86776	0.00462242
0.0151572	-6.04386	0.00413242
0.0134155	-6.21995	0.00369378
0.011874	-6.39605	0.00330085
0.0105096	-6.57215	0.00294794
0.00930201	-6.74824	0.00262982
0.00823316	-6.92434	0.00234145
0.00728712	-7.10043	0.0020786
0.0064498	-7.27653	0.00183779
0.00570868	-7.45263	0.00161637
0.00505272	-7.62872	0.00141244
0.00447214	-7.80482	0.00122488
0.00395826	-7.98092	0.00105305
0.00350344	-8.15701	0.000896737
0.00310087	-8.33311	0.000755975
0.00274457	-8.50921	0.000630944
0.0024292	-8.6853	0.000521392
0.00215007	-8.8614	0.000427393
0.00190302	-9.0375	0.000347382
0.00168435	-9.21359	0.000278364
0.00149081	-9.38969	0.000230856
0.00131951	-9.56578	0.000195537
0.00116789	-9.74188	0.000156854
0.00103369	-9.91798	0.000119981
0.000914916	-10.0941	8.16813e-05
0.000809787	-10.2702	4.10187e-05
0.000716738	-10.4463	1.03694e-05
0.000634381	-10.6224	0
0.000561487	-10.7985	0
0.000496969	-10.9746	0
0.000439865	-11.1507	0
0.000389322	-11.3267	0
0.000344587	-11.5028	0

## Sheet: BC6
Site BC6						Fraction > 10 mm sieved in the field; fragments larger than 80 mm weighed individually.
Bean Creek						Fraction < 10 mm sampled (~1-2 kg).
Easting	Northing					Fraction 1-10 mm sieved in the lab.
644500	4390200					Fraction < 1 mm characterised using a Malvern laser grain size analyser.
Total sample mass = 59.4 kg
Cumulative grain size data
Grain size
mm	-phi	% mass finer than…
200.87	7.65011	1
181.559	7.5043	0.810727
156.933	7.294	0.670961
101.729	6.66858	0.580702
98.3671	6.6201	0.556117
93.6757	6.5496	0.533889
86.5777	6.43592	0.514692
82.5449	6.36711	0.499537
80	6.32193	0.486402
40	5.32193	0.358424
20	4.32193	0.290393
10	3.32193	0.239875
8	3	0.23433
5.6	2.48543	0.216853
4	2	0.195198
2	1	0.141087
1.4	0.485427	0.11019
1	0	0.0864708
0.961542	-0.0565784	0.0864708
0.851056	-0.232675	0.0846032
0.753265	-0.408771	0.0819903
0.666711	-0.584868	0.0790477
0.590102	-0.760964	0.0759417
0.522296	-0.93706	0.0727748
0.462281	-1.11316	0.0696566
0.409163	-1.28925	0.066676
0.362148	-1.46535	0.0638909
0.320535	-1.64145	0.0613297
0.283704	-1.81754	0.0589935
0.251105	-1.99364	0.0568621
0.222251	-2.16974	0.0549007
0.196714	-2.34583	0.0530662
0.17411	-2.52193	0.0513112
0.154104	-2.69802	0.0495879
0.136397	-2.87412	0.047851
0.120724	-3.05022	0.0460613
0.106852	-3.22631	0.0441891
0.0945742	-3.40241	0.0422157
0.0837071	-3.57851	0.0401342
0.0740887	-3.7546	0.0379499
0.0655755	-3.9307	0.035678
0.0580405	-4.1068	0.0333419
0.0513714	-4.28289	0.0309716
0.0454685	-4.45899	0.0286015
0.0402439	-4.63508	0.0262679
0.0356197	-4.81118	0.0240054
0.0315268	-4.98728	0.0218446
0.0279042	-5.16337	0.0198101
0.0246979	-5.33947	0.0179193
0.0218599	-5.51557	0.0161823
0.0193481	-5.69166	0.0146026
0.0171249	-5.86776	0.0131757
0.0151572	-6.04386	0.0118936
0.0134155	-6.21995	0.0107449
0.011874	-6.39605	0.00971678
0.0105096	-6.57215	0.00879546
0.00930201	-6.74824	0.00796799
0.00823316	-6.92434	0.00722133
0.00728712	-7.10043	0.00654417
0.0064498	-7.27653	0.00592687
0.00570868	-7.45263	0.00536155
0.00505272	-7.62872	0.00484206
0.00447214	-7.80482	0.00436404
0.00395826	-7.98092	0.00392431
0.00350344	-8.15701	0.00352093
0.00310087	-8.33311	0.0031529
0.00274457	-8.50921	0.00281984
0.0024292	-8.6853	0.00252125
0.00215007	-8.8614	0.00225615
0.00190302	-9.0375	0.00202226
0.00168435	-9.21359	0.00181494
0.00149081	-9.38969	0.00162631
0.00131951	-9.56578	0.00144604
0.00116789	-9.74188	0.00126384
0.00103369	-9.91798	0.00107253
0.000914916	-10.0941	0.000870481
0.000809787	-10.2702	0.000662247
0.000716738	-10.4463	0.00045937
0.000634381	-10.6224	0.000271951
0.000561487	-10.7985	0.000120915
0.000496969	-10.9746	1.36589e-05
0.000439865	-11.1507	0
0.000389322	-11.3267	0
0.000344587	-11.5028	0

## Sheet: BRB8_9f
Site BRB-8/9f						Fraction > 10 mm sieved in the field; fragments larger than 80 mm weighed individually.
Bald Rock basin						Fraction < 10 mm sampled (~1-2 kg).
Easting	Northing					Fraction 1-10 mm sieved in the lab.
645575	4390100					Fraction < 1 mm characterised using a Malvern laser grain size analyser.
Total sample mass = 26.6 kg
Cumulative grain size data
Grain size
mm	-phi	% mass finer than…
94.7587	6.56619	1
85.9316	6.42512	0.955624
80	6.32193	0.922531
40	5.32193	0.778874
20	4.32193	0.623184
10	3.32193	0.442673
8	3	0.403612
5.6	2.48543	0.354768
4	2	0.320286
2	1	0.252779
1.4	0.485427	0.203311
1	0	0.159741
0.961542	-0.0565784	0.159741
0.851056	-0.232675	0.152664
0.753265	-0.408771	0.142844
0.666711	-0.584868	0.131891
0.590102	-0.760964	0.120412
0.522296	-0.93706	0.108778
0.462281	-1.11316	0.0973929
0.409163	-1.28925	0.0865964
0.362148	-1.46535	0.0766325
0.320535	-1.64145	0.0676499
0.283704	-1.81754	0.0597075
0.251105	-1.99364	0.0527896
0.222251	-2.16974	0.046827
0.196714	-2.34583	0.0417212
0.17411	-2.52193	0.0373562
0.154104	-2.69802	0.0336127
0.136397	-2.87412	0.030382
0.120724	-3.05022	0.0275687
0.106852	-3.22631	0.0250927
0.0945742	-3.40241	0.0228902
0.0837071	-3.57851	0.0209105
0.0740887	-3.7546	0.0191133
0.0655755	-3.9307	0.0174677
0.0580405	-4.1068	0.0159496
0.0513714	-4.28289	0.0145404
0.0454685	-4.45899	0.0132261
0.0402439	-4.63508	0.0119975
0.0356197	-4.81118	0.0108478
0.0315268	-4.98728	0.00977382
0.0279042	-5.16337	0.00877386
0.0246979	-5.33947	0.00784735
0.0218599	-5.51557	0.00699375
0.0193481	-5.69166	0.00621248
0.0171249	-5.86776	0.00550109
0.0151572	-6.04386	0.00485667
0.0134155	-6.21995	0.00427541
0.011874	-6.39605	0.00375272
0.0105096	-6.57215	0.00328343
0.00930201	-6.74824	0.00286235
0.00823316	-6.92434	0.00248372
0.00728712	-7.10043	0.0021422
0.0064498	-7.27653	0.00183303
0.00570868	-7.45263	0.00155212
0.00505272	-7.62872	0.00129632
0.00447214	-7.80482	0.00106344
0.00395826	-7.98092	0.000852028
0.00350344	-8.15701	0.000661247
0.00310087	-8.33311	0.000490644
0.00274457	-8.50921	0.000341144
0.0024292	-8.6853	0.000208928
0.00215007	-8.8614	0.000102638
0.00190302	-9.0375	3.817e-05
0.00168435	-9.21359	0
0.00149081	-9.38969	0
0.00131951	-9.56578	0
0.00116789	-9.74188	0
0.00103369	-9.91798	0
0.000914916	-10.0941	0
0.000809787	-10.2702	0
0.000716738	-10.4463	0
0.000634381	-10.6224	0
0.000561487	-10.7985	0
0.000496969	-10.9746	0
0.000439865	-11.1507	0
0.000389322	-11.3267	0
0.000344587	-11.5028	0

## Sheet: BRB10f
Site BRB-10f						Fraction > 10 mm sieved in the field; fragments larger than 80 mm weighed individually.
Bald Rock basin						Fraction < 10 mm sampled (~1-2 kg).
Easting	Northing					Fraction 1-10 mm sieved in the lab.
645485	4389940					Fraction < 1 mm characterised using a Malvern laser grain size analyser.
Total sample mass = 23.0 kg
Cumulative grain size data
Grain size
mm	-phi	% mass finer than…
80	6.32193	1
40	5.32193	0.958241
20	4.32193	0.904302
10	3.32193	0.822523
8	3	0.8144
5.6	2.48543	0.78241
4	2	0.756917
2	1	0.653697
1.4	0.485427	0.538981
1	0	0.403895
0.961542	-0.0565784	0.403895
0.851056	-0.232675	0.39205
0.753265	-0.408771	0.375059
0.666711	-0.584868	0.355195
0.590102	-0.760964	0.333313
0.522296	-0.93706	0.309877
0.462281	-1.11316	0.285518
0.409163	-1.28925	0.260853
0.362148	-1.46535	0.236452
0.320535	-1.64145	0.212809
0.283704	-1.81754	0.190335
0.251105	-1.99364	0.169352
0.222251	-2.16974	0.150094
0.196714	-2.34583	0.132722
0.17411	-2.52193	0.117311
0.154104	-2.69802	0.103852
0.136397	-2.87412	0.0922726
0.120724	-3.05022	0.0824467
0.106852	-3.22631	0.0742067
0.0945742	-3.40241	0.0673624
0.0837071	-3.57851	0.0617093
0.0740887	-3.7546	0.0570338
0.0655755	-3.9307	0.053137
0.0580405	-4.1068	0.049836
0.0513714	-4.28289	0.0469699
0.0454685	-4.45899	0.0444043
0.0402439	-4.63508	0.042033
0.0356197	-4.81118	0.039776
0.0315268	-4.98728	0.0375805
0.0279042	-5.16337	0.0354147
0.0246979	-5.33947	0.0332642
0.0218599	-5.51557	0.0311268
0.0193481	-5.69166	0.0290093
0.0171249	-5.86776	0.0269227
0.0151572	-6.04386	0.0248805
0.0134155	-6.21995	0.0228962
0.011874	-6.39605	0.0209821
0.0105096	-6.57215	0.0191477
0.00930201	-6.74824	0.0174004
0.00823316	-6.92434	0.0157442
0.00728712	-7.10043	0.0141807
0.0064498	-7.27653	0.0127103
0.00570868	-7.45263	0.0113326
0.00505272	-7.62872	0.0100473
0.00447214	-7.80482	0.00885494
0.00395826	-7.98092	0.00775607
0.00350344	-8.15701	0.0067519
0.00310087	-8.33311	0.00584396
0.00274457	-8.50921	0.0050336
0.0024292	-8.6853	0.00432076
0.00215007	-8.8614	0.00370336
0.00190302	-9.0375	0.00317568
0.00168435	-9.21359	0.00272669
0.00149081	-9.38969	0.00233948
0.00131951	-9.56578	0.00199283
0.00116789	-9.74188	0.0016661
0.00103369	-9.91798	0.00134368
0.000914916	-10.0941	0.00101937
0.000809787	-10.2702	0.000701582
0.000716738	-10.4463	0.000392279
0.000634381	-10.6224	0.000138334
0.000561487	-10.7985	0
0.000496969	-10.9746	0
0.000439865	-11.1507	0
0.000389322	-11.3267	0
0.000344587	-11.5028	0

## Sheet: BRBf1
Site BRB-f1						Fraction > 10 mm sieved in the field; fragments larger than 80 mm weighed individually.
Bald Rock basin						Fraction < 10 mm sampled (~1-2 kg).
Easting	Northing					Fraction 1-10 mm sieved in the lab.
645420	4389900					Fraction < 1 mm characterised using a Malvern laser grain size analyser.
Total sample mass = 34.8 kg
Cumulative grain size data
Grain size
mm	-phi	% mass finer than…
85.2756	6.41406	1
82.5449	6.36711	0.975263
80	6.32193	0.952827
40	5.32193	0.816484
20	4.32193	0.742847
10	3.32193	0.654828
8	3	0.645964
5.6	2.48543	0.625797
4	2	0.605187
2	1	0.535267
1.4	0.485427	0.462799
1	0	0.393766
0.961542	-0.0565784	0.393766
0.851056	-0.232675	0.383142
0.753265	-0.408771	0.368226
0.666711	-0.584868	0.351302
0.590102	-0.760964	0.33322
0.522296	-0.93706	0.314469
0.462281	-1.11316	0.295603
0.409163	-1.28925	0.277087
0.362148	-1.46535	0.259262
0.320535	-1.64145	0.242345
0.283704	-1.81754	0.226433
0.251105	-1.99364	0.211538
0.222251	-2.16974	0.19761
0.196714	-2.34583	0.184573
0.17411	-2.52193	0.172339
0.154104	-2.69802	0.160827
0.136397	-2.87412	0.14997
0.120724	-3.05022	0.139724
0.106852	-3.22631	0.130068
0.0945742	-3.40241	0.121002
0.0837071	-3.57851	0.112533
0.0740887	-3.7546	0.104659
0.0655755	-3.9307	0.0973665
0.0580405	-4.1068	0.0906207
0.0513714	-4.28289	0.0843698
0.0454685	-4.45899	0.0785495
0.0402439	-4.63508	0.0730922
0.0356197	-4.81118	0.0679326
0.0315268	-4.98728	0.0630199
0.0279042	-5.16337	0.0583203
0.0246979	-5.33947	0.0538162
0.0218599	-5.51557	0.0495047
0.0193481	-5.69166	0.045395
0.0171249	-5.86776	0.0414984
0.0151572	-6.04386	0.0378281
0.0134155	-6.21995	0.0343942
0.011874	-6.39605	0.0312009
0.0105096	-6.57215	0.028245
0.00930201	-6.74824	0.0255181
0.00823316	-6.92434	0.0230041
0.00728712	-7.10043	0.0206845
0.0064498	-7.27653	0.0185407
0.00570868	-7.45263	0.016556
0.00505272	-7.62872	0.0147176
0.00447214	-7.80482	0.0130179
0.00395826	-7.98092	0.0114529
0.00350344	-8.15701	0.0100225
0.00310087	-8.33311	0.00872918
0.00274457	-8.50921	0.00757618
0.0024292	-8.6853	0.00656497
0.00215007	-8.8614	0.00569366
0.00190302	-9.0375	0.00495425
0.00168435	-9.21359	0.0043296
0.00149081	-9.38969	0.00379188
0.00131951	-9.56578	0.00330542
0.00116789	-9.74188	0.00283482
0.00103369	-9.91798	0.00235396
0.000914916	-10.0941	0.00185349
0.000809787	-10.2702	0.00134508
0.000716738	-10.4463	0.000850503
0.000634381	-10.6224	0.000417557
0.000561487	-10.7985	7.9899e-05
0.000496969	-10.9746	0
0.000439865	-11.1507	0
0.000389322	-11.3267	0
0.000344587	-11.5028	0

## Sheet: BRBf2
Site BRB-f2						Fraction > 10 mm sieved in the field; fragments larger than 80 mm weighed individually.
Bald Rock basin						Fraction < 10 mm sampled (~1-2 kg).
Easting	Northing					Fraction 1-10 mm sieved in the lab.
645245	4389820					Fraction < 1 mm characterised using a Malvern laser grain size analyser.
Total sample mass = 27.5 kg
Cumulative grain size data
Grain size
mm	-phi	% mass finer than…
78.1	6.32193	1
40	5.32193	0.965057
20	4.32193	0.921379
10	3.32193	0.801992
8	3	0.775605
5.6	2.48543	0.743322
4	2	0.712513
2	1	0.619497
1.4	0.485427	0.523532
1	0	0.419607
0.961542	-0.0565784	0.419607
0.851056	-0.232675	0.407005
0.753265	-0.408771	0.38933
0.666711	-0.584868	0.369316
0.590102	-0.760964	0.348001
0.522296	-0.93706	0.325995
0.462281	-1.11316	0.303987
0.409163	-1.28925	0.282571
0.362148	-1.46535	0.262192
0.320535	-1.64145	0.243145
0.283704	-1.81754	0.225583
0.251105	-1.99364	0.209537
0.222251	-2.16974	0.194952
0.196714	-2.34583	0.181722
0.17411	-2.52193	0.169708
0.154104	-2.69802	0.158756
0.136397	-2.87412	0.148721
0.120724	-3.05022	0.139472
0.106852	-3.22631	0.130902
0.0945742	-3.40241	0.122926
0.0837071	-3.57851	0.115476
0.0740887	-3.7546	0.108495
0.0655755	-3.9307	0.101929
0.0580405	-4.1068	0.0957265
0.0513714	-4.28289	0.0898335
0.0454685	-4.45899	0.0841999
0.0402439	-4.63508	0.0787817
0.0356197	-4.81118	0.0735424
0.0315268	-4.98728	0.0684594
0.0279042	-5.16337	0.0635232
0.0246979	-5.33947	0.0587361
0.0218599	-5.51557	0.0541098
0.0193481	-5.69166	0.0496637
0.0171249	-5.86776	0.0454172
0.0151572	-6.04386	0.0413903
0.0134155	-6.21995	0.0375994
0.011874	-6.39605	0.0340552
0.0105096	-6.57215	0.0307616
0.00930201	-6.74824	0.0277169
0.00823316	-6.92434	0.0249108
0.00728712	-7.10043	0.0223296
0.0064498	-7.27653	0.0199576
0.00570868	-7.45263	0.0177788
0.00505272	-7.62872	0.0157796
0.00447214	-7.80482	0.0139497
0.00395826	-7.98092	0.0122809
0.00350344	-8.15701	0.0107683
0.00310087	-8.33311	0.00940915
0.00274457	-8.50921	0.00820198
0.0024292	-8.6853	0.00714397
0.00215007	-8.8614	0.00622987
0.00190302	-9.0375	0.00544926
0.00168435	-9.21359	0.00478353
0.00149081	-9.38969	0.00420424
0.00131951	-9.56578	0.00367563
0.00116789	-9.74188	0.00316261
0.00103369	-9.91798	0.00263962
0.000914916	-10.0941	0.00209805
0.000809787	-10.2702	0.00155012
0.000716738	-10.4463	0.0010192
0.000634381	-10.6224	0.00055284
0.000561487	-10.7985	0.000183162
0.000496969	-10.9746	0
0.000439865	-11.1507	0
0.000389322	-11.3267	0
0.000344587	-11.5028	0

[truncated: 11 more sheets: BAC1, BAC2, BAC3, BAC4, BAC5, BAC6, LNF1, LNF2, CC, BerC1f, BALDf]
