# Supplementary material for: Impact of change in erosion rate and landscape steepness on hillslope and fluvial sediments grain size in the Feather River basin (Sierra Nevada, California)
Source: Copernicus journal article supplement (doi:10.5194/esurf-3-201-2015), 2015-03-25
Supplement: Supplementary file 1 [file esurf-3-201-2015-supplement.zip]

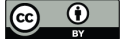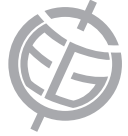

## *Supplement of*

# **Impact of change in erosion rate and landscape steepness on hillslope and fluvial sediments grain size in the Feather River basin (Sierra Nevada, California)**

**M. Attal et al.**

*Correspondence to:* M. Attal ([mikael.attal@ed.ac.uk](mailto:mikael.attal@ed.ac.uk))

- [esurf-3-201-2015-supplement-cover-letter.pdf](#)
- [Data\\_RiverSedimentGSD\\_FeatherRiver\\_Attal2015.xlsx](#)
- [Data\\_SoilLandslidesGSD\\_FeatherRiver\\_Attal2015.xlsx](#)
