# Supplementary material for: Impact of change in erosion rate and landscape steepness on hillslope and fluvial sediments grain size in the Feather River basin (Sierra Nevada, California)
Source: Copernicus journal article supplement (doi:10.5194/esurf-3-201-2015), 2015-03-25
Supplement: Supplementary file 2 [file Data_SoilLandslidesGSD_FeatherRiver_Attal2015.xlsx]

## Sheet: POMD2
Site POMD2						Fraction > 10 mm sieved in the field; fragments larger than 80 mm weighed individually.
Soil						Fraction < 10 mm sampled (~1-2 kg).
Easting	Northing					Fraction 1-10 mm sieved in the lab.
645385	4.3897e+06					Fraction < 1 mm characterised using a Malvern laser grain size analyser.
Total sample mass = 227.0 kg
Cumulative grain size data
Grain size
mm	-phi	% mass finer than…
58	5.85798	0.999694
40	5.32193	0.998461
20	4.32193	0.994672
10	3.32193	0.990884
8	3	0.98899
5.6	2.48543	0.987097
4	2	0.984362
2.8	1.48543	0.97642
2	1	0.949069
1.4	0.485427	0.874888
1.041	0.0579701	0.7867
0.9483	-0.0765846	0.780759
0.8639	-0.211064	0.773392
0.7869	-0.345748	0.765788
0.7169	-0.480156	0.758738
0.653	-0.614845	0.752164
0.5949	-0.749281	0.745193
0.5419	-0.883901	0.736639
0.4936	-1.01859	0.725391
0.4497	-1.15297	0.71137
0.4096	-1.28771	0.695686
0.3731	-1.42237	0.680082
0.3399	-1.55682	0.665982
0.3096	-1.69152	0.653625
0.2821	-1.82572	0.642377
0.2569	-1.96072	0.63105
0.2341	-2.0948	0.618456
0.2132	-2.22972	0.60396
0.1942	-2.36438	0.587801
0.1769	-2.49899	0.570612
0.1612	-2.63308	0.552948
0.1468	-2.76808	0.535205
0.1337	-2.90293	0.517382
0.1218	-3.03741	0.499481
0.111	-3.17137	0.481579
0.1011	-3.30615	0.463994
0.0921	-3.44066	0.447043
0.0839	-3.57519	0.430805
0.07643	-3.70972	0.415359
0.06962	-3.84435	0.400546
0.06342	-3.97892	0.386288
0.05777	-4.11354	0.372506
0.05263	-4.24797	0.359198
0.04794	-4.38263	0.346366
0.04367	-4.51721	0.333851
0.03978	-4.65181	0.321652
0.03624	-4.78627	0.309691
0.03301	-4.92095	0.29781
0.03007	-5.05553	0.286086
0.02739	-5.19021	0.274601
0.02495	-5.32482	0.263432
0.02273	-5.45926	0.25258
0.02071	-5.59353	0.242124
0.01886	-5.72853	0.231906
0.01718	-5.86313	0.221767
0.01565	-5.99769	0.211628
0.01426	-6.13188	0.20141
0.01299	-6.26645	0.191112
0.01183	-6.40141	0.180894
0.01078	-6.5355	0.170834
0.009819	-6.67021	0.161091
0.008944	-6.80486	0.151665
0.008148	-6.93934	0.142635
0.007422	-7.07398	0.13408
0.006761	-7.20855	0.125922
0.006159	-7.34309	0.118159
0.005611	-7.47753	0.110872
0.005111	-7.61218	0.10398
0.004656	-7.74669	0.0974058
0.004241	-7.88138	0.0912273
0.003863	-8.01606	0.0853657
0.003519	-8.15062	0.0798209
0.003206	-8.28501	0.0745138
0.00292	-8.41982	0.0695235
0.00266	-8.55436	0.0647708
0.002423	-8.68899	0.0602558
0.002208	-8.82304	0.0558992
0.002011	-8.95787	0.0517802
0.001832	-9.09236	0.0478197
0.001669	-9.2268	0.0440176
0.00152	-9.36171	0.0402946
0.001385	-9.4959	0.0366509
0.001261	-9.63122	0.0330864
0.001149	-9.76541	0.0296012
0.001047	-9.89952	0.0261159
0.000954	-10.0337	0.0227098
0.000869	-10.1684	0.0194621
0.000791	-10.304	0.0162937
0.000721	-10.4377	0.0132837
0.000657	-10.5718	0.0105113
0.000598	-10.7076	0.00797655
0.000545	-10.8415	0.00575864
0.000496	-10.9774	0.00385758
0.000452	-11.1114	0.00227336
0.000412	-11.2451	0.0011644
0.000375	-11.3808	0.000419818

## Sheet: POMD4
Site POMD4						Fraction > 10 mm sieved in the field; fragments larger than 80 mm weighed individually.
Soil						Fraction < 10 mm sampled (~1-2 kg).
Easting	Northing					Fraction 1-10 mm sieved in the lab.
645376	4.38972e+06					Fraction < 1 mm characterised using a Malvern laser grain size analyser.
Total sample mass = 163.3 kg
Cumulative grain size data
Grain size
mm	-phi	% mass finer than…
63.3948	5.98629	0.999745
53.7973	5.74946	0.997541
40	5.32193	0.996195
20	4.32193	0.993868
10	3.32193	0.991542
8	3	0.990959
5.6	2.48543	0.987975
4	2	0.982589
2.8	1.48543	0.971452
2	1	0.936515
1.4	0.485427	0.861509
1.041	0.0579701	0.775913
0.9483	-0.0765846	0.768707
0.8639	-0.211064	0.760406
0.7869	-0.345748	0.752339
0.7169	-0.480156	0.745212
0.653	-0.614845	0.738946
0.5949	-0.749281	0.732524
0.5419	-0.883901	0.724614
0.4936	-1.01859	0.714119
0.4497	-1.15297	0.700962
0.4096	-1.28771	0.686316
0.3731	-1.42237	0.67214
0.3399	-1.55682	0.659923
0.3096	-1.69152	0.649898
0.2821	-1.82572	0.641204
0.2569	-1.96072	0.632511
0.2341	-2.0948	0.622486
0.2132	-2.22972	0.610425
0.1942	-2.36438	0.596328
0.1769	-2.49899	0.580742
0.1612	-2.63308	0.564452
0.1468	-2.76808	0.54777
0.1337	-2.90293	0.530775
0.1218	-3.03741	0.513466
0.111	-3.17137	0.496079
0.1011	-3.30615	0.478928
0.0921	-3.44066	0.462324
0.0839	-3.57519	0.446425
0.07643	-3.70972	0.43131
0.06962	-3.84435	0.416742
0.06342	-3.97892	0.402645
0.05777	-4.11354	0.389018
0.05263	-4.24797	0.375782
0.04794	-4.38263	0.363016
0.04367	-4.51721	0.350641
0.03978	-4.65181	0.33858
0.03624	-4.78627	0.326832
0.03301	-4.92095	0.315241
0.03007	-5.05553	0.303728
0.02739	-5.19021	0.292372
0.02495	-5.32482	0.281251
0.02273	-5.45926	0.270365
0.02071	-5.59353	0.259791
0.01886	-5.72853	0.249532
0.01718	-5.86313	0.23935
0.01565	-5.99769	0.22909
0.01426	-6.13188	0.218752
0.01299	-6.26645	0.208258
0.01183	-6.40141	0.197763
0.01078	-6.5355	0.187347
0.009819	-6.67021	0.177165
0.008944	-6.80486	0.167297
0.008148	-6.93934	0.157742
0.007422	-7.07398	0.148579
0.006761	-7.20855	0.139807
0.006159	-7.34309	0.131505
0.005611	-7.47753	0.123595
0.005111	-7.61218	0.116076
0.004656	-7.74669	0.108871
0.004241	-7.88138	0.102057
0.003863	-8.01606	0.0955568
0.003519	-8.15062	0.0893696
0.003206	-8.28501	0.0834957
0.00292	-8.41982	0.0779351
0.00266	-8.55436	0.0726094
0.002423	-8.68899	0.0675187
0.002208	-8.82304	0.0626629
0.002011	-8.95787	0.0580421
0.001832	-9.09236	0.0535779
0.001669	-9.2268	0.0492704
0.00152	-9.36171	0.0451195
0.001385	-9.4959	0.0410469
0.001261	-9.63122	0.0370527
0.001149	-9.76541	0.0331367
0.001047	-9.89952	0.0292991
0.000954	-10.0337	0.0255398
0.000869	-10.1684	0.0218588
0.000791	-10.304	0.0183344
0.000721	-10.4377	0.0149667
0.000657	-10.5718	0.011834
0.000598	-10.7076	0.0090145
0.000545	-10.8415	0.0065083
0.000496	-10.9774	0.00431537
0.000452	-11.1114	0.00259235
0.000412	-11.2451	0.00133925
0.000375	-11.3808	0.000477745

## Sheet: POMD6
Site POMD6						Fraction > 10 mm sieved in the field; fragments larger than 80 mm weighed individually.
Soil						Fraction < 10 mm sampled (~1-2 kg).
Easting	Northing					Fraction 1-10 mm sieved in the lab.
645362	4.38973e+06					Fraction < 1 mm characterised using a Malvern laser grain size analyser.
Total sample mass = 550.4 kg
Cumulative grain size data
Grain size
mm	-phi	% mass finer than…
40	5.32193	0.999834
20	4.32193	0.994457
10	3.32193	0.980903
8	3	0.97892
5.6	2.48543	0.969389
4	2	0.95781
2.8	1.48543	0.93574
2	1	0.886481
1.4	0.485427	0.799983
1.041	0.0579701	0.711462
0.9483	-0.0765846	0.704841
0.8639	-0.211064	0.69714
0.7869	-0.345748	0.689512
0.7169	-0.480156	0.682891
0.653	-0.614845	0.677421
0.5949	-0.749281	0.672527
0.5419	-0.883901	0.667274
0.4936	-1.01859	0.660797
0.4497	-1.15297	0.652736
0.4096	-1.28771	0.643596
0.3731	-1.42237	0.634672
0.3399	-1.55682	0.627116
0.3096	-1.69152	0.621286
0.2821	-1.82572	0.616608
0.2569	-1.96072	0.612218
0.2341	-2.0948	0.607108
0.2132	-2.22972	0.600559
0.1942	-2.36438	0.592355
0.1769	-2.49899	0.582711
0.1612	-2.63308	0.57206
0.1468	-2.76808	0.560473
0.1337	-2.90293	0.548095
0.1218	-3.03741	0.534924
0.111	-3.17137	0.521179
0.1011	-3.30615	0.507217
0.0921	-3.44066	0.493327
0.0839	-3.57519	0.479581
0.07643	-3.70972	0.465979
0.06962	-3.84435	0.452377
0.06342	-3.97892	0.438703
0.05777	-4.11354	0.424885
0.05263	-4.24797	0.410995
0.04794	-4.38263	0.397177
0.04367	-4.51721	0.383432
0.03978	-4.65181	0.369686
0.03624	-4.78627	0.356012
0.03301	-4.92095	0.342338
0.03007	-5.05553	0.328736
0.02739	-5.19021	0.315278
0.02495	-5.32482	0.302108
0.02273	-5.45926	0.289441
0.02071	-5.59353	0.277207
0.01886	-5.72853	0.265404
0.01718	-5.86313	0.253817
0.01565	-5.99769	0.242302
0.01426	-6.13188	0.230787
0.01299	-6.26645	0.219272
0.01183	-6.40141	0.207757
0.01078	-6.5355	0.196458
0.009819	-6.67021	0.185447
0.008944	-6.80486	0.174796
0.008148	-6.93934	0.164577
0.007422	-7.07398	0.154789
0.006761	-7.20855	0.145505
0.006159	-7.34309	0.136653
0.005611	-7.47753	0.128305
0.005111	-7.61218	0.120388
0.004656	-7.74669	0.112832
0.004241	-7.88138	0.105707
0.003863	-8.01606	0.0989417
0.003519	-8.15062	0.0925366
0.003206	-8.28501	0.0864193
0.00292	-8.41982	0.0806618
0.00266	-8.55436	0.0751923
0.002423	-8.68899	0.0699386
0.002208	-8.82304	0.0649728
0.002011	-8.95787	0.0602229
0.001832	-9.09236	0.0556169
0.001669	-9.2268	0.0512269
0.00152	-9.36171	0.0469088
0.001385	-9.4959	0.0427347
0.001261	-9.63122	0.0386325
0.001149	-9.76541	0.0345303
0.001047	-9.89952	0.0305001
0.000954	-10.0337	0.0265418
0.000869	-10.1684	0.0227275
0.000791	-10.304	0.0190572
0.000721	-10.4377	0.0155307
0.000657	-10.5718	0.0122921
0.000598	-10.7076	0.00934146
0.000545	-10.8415	0.00667864
0.000496	-10.9774	0.00444763
0.000452	-11.1114	0.00264843
0.000412	-11.2451	0.001353
0.000375	-11.3808	0.000489383

## Sheet: FTA1
Site FTA1						Fraction > 10 mm sieved in the field; fragments larger than 80 mm weighed individually.
Soil						Fraction < 10 mm sampled (~1-2 kg).
Easting	Northing					Fraction 1-10 mm sieved in the lab.
645634	4.39005e+06					Fraction < 1 mm characterised using a Malvern laser grain size analyser.
Total sample mass = 122.3 kg
Cumulative grain size data
Grain size
mm	-phi	% mass finer than…
27	4.75489	1.00012
20	4.32193	0.999627
10	3.32193	0.993739
8	3	0.990125
5.6	2.48543	0.978478
4	2	0.956991
2.8	1.48543	0.917129
2	1	0.849556
1.4	0.485427	0.762971
1.041	0.0579701	0.679211
0.9483	-0.0765846	0.66954
0.8639	-0.211064	0.657727
0.7869	-0.345748	0.644878
0.7169	-0.480156	0.631961
0.653	-0.614845	0.61925
0.5949	-0.749281	0.606263
0.5419	-0.883901	0.592033
0.4936	-1.01859	0.575661
0.4497	-1.15297	0.55694
0.4096	-1.28771	0.536769
0.3731	-1.42237	0.516943
0.3399	-1.55682	0.499121
0.3096	-1.69152	0.484061
0.2821	-1.82572	0.471212
0.2569	-1.96072	0.459262
0.2341	-2.0948	0.44662
0.2132	-2.22972	0.432044
0.1942	-2.36438	0.415051
0.1769	-2.49899	0.396123
0.1612	-2.63308	0.376297
0.1468	-2.76808	0.356679
0.1337	-2.90293	0.337889
0.1218	-3.03741	0.320135
0.111	-3.17137	0.303418
0.1011	-3.30615	0.287737
0.0921	-3.44066	0.272954
0.0839	-3.57519	0.259069
0.07643	-3.70972	0.246013
0.06962	-3.84435	0.233717
0.06342	-3.97892	0.222181
0.05777	-4.11354	0.211404
0.05263	-4.24797	0.201319
0.04794	-4.38263	0.191855
0.04367	-4.51721	0.183012
0.03978	-4.65181	0.174654
0.03624	-4.78627	0.166641
0.03301	-4.92095	0.158973
0.03007	-5.05553	0.15165
0.02739	-5.19021	0.144604
0.02495	-5.32482	0.137904
0.02273	-5.45926	0.131548
0.02071	-5.59353	0.125538
0.01886	-5.72853	0.119805
0.01718	-5.86313	0.114209
0.01565	-5.99769	0.108752
0.01426	-6.13188	0.103364
0.01299	-6.26645	0.0981137
0.01183	-6.40141	0.0929327
0.01078	-6.5355	0.087959
0.009819	-6.67021	0.0831925
0.008944	-6.80486	0.0786333
0.008148	-6.93934	0.0742813
0.007422	-7.07398	0.0702056
0.006761	-7.20855	0.0663371
0.006159	-7.34309	0.0626759
0.005611	-7.47753	0.0591528
0.005111	-7.61218	0.055837
0.004656	-7.74669	0.0526594
0.004241	-7.88138	0.0496199
0.003863	-8.01606	0.0467876
0.003519	-8.15062	0.0440935
0.003206	-8.28501	0.0414685
0.00292	-8.41982	0.0389816
0.00266	-8.55436	0.0366329
0.002423	-8.68899	0.0343533
0.002208	-8.82304	0.0321427
0.002011	-8.95787	0.0300013
0.001832	-9.09236	0.0279289
0.001669	-9.2268	0.0258565
0.00152	-9.36171	0.0238532
0.001385	-9.4959	0.0218499
0.001261	-9.63122	0.0198466
0.001149	-9.76541	0.0178433
0.001047	-9.89952	0.0158399
0.000954	-10.0337	0.0138366
0.000869	-10.1684	0.0119024
0.000791	-10.304	0.00996818
0.000721	-10.4377	0.00817211
0.000657	-10.5718	0.00644512
0.000598	-10.7076	0.00492537
0.000545	-10.8415	0.00354378
0.000496	-10.9774	0.00236943
0.000452	-11.1114	0.00140232
0.000412	-11.2451	0.000725335
0.000375	-11.3808	0.000262502

## Sheet: FTA9
Site FTA9						Fraction > 10 mm sieved in the field; fragments larger than 80 mm weighed individually.
Soil						Fraction < 10 mm sampled (~1-2 kg).
Easting	Northing					Fraction 1-10 mm sieved in the lab.
645625	4.39006e+06					Fraction < 1 mm characterised using a Malvern laser grain size analyser.
Total sample mass = 173.0 kg
Cumulative grain size data
Grain size
mm	-phi	% mass finer than…
219.973	7.78118	0.999986
106.358	6.73278	0.913029
73.454	6.19877	0.9032
68.7921	6.10417	0.899963
48.3793	5.59632	0.897303
40	5.32193	0.896378
20	4.32193	0.893719
10	3.32193	0.884583
8	3	0.881365
5.6	2.48543	0.870996
4	2	0.851867
2.8	1.48543	0.816379
2	1	0.75622
1.4	0.485427	0.679169
1.041	0.0579701	0.606875
0.9483	-0.0765846	0.60091
0.8639	-0.211064	0.594391
0.7869	-0.345748	0.588118
0.7169	-0.480156	0.582337
0.653	-0.614845	0.576679
0.5949	-0.749281	0.570283
0.5419	-0.883901	0.562042
0.4936	-1.01859	0.550972
0.4497	-1.15297	0.537011
0.4096	-1.28771	0.521206
0.3731	-1.42237	0.505339
0.3399	-1.55682	0.491009
0.3096	-1.69152	0.478832
0.2821	-1.82572	0.468377
0.2569	-1.96072	0.458476
0.2341	-2.0948	0.447713
0.2132	-2.22972	0.435044
0.1942	-2.36438	0.420161
0.1769	-2.49899	0.403433
0.1612	-2.63308	0.385783
0.1468	-2.76808	0.367948
0.1337	-2.90293	0.35042
0.1218	-3.03741	0.333446
0.111	-3.17137	0.31721
0.1011	-3.30615	0.301712
0.0921	-3.44066	0.287075
0.0839	-3.57519	0.273299
0.07643	-3.70972	0.260323
0.06962	-3.84435	0.248023
0.06342	-3.97892	0.2364
0.05777	-4.11354	0.225391
0.05263	-4.24797	0.215059
0.04794	-4.38263	0.205404
0.04367	-4.51721	0.196363
0.03978	-4.65181	0.187876
0.03624	-4.78627	0.17982
0.03301	-4.92095	0.172071
0.03007	-5.05553	0.164568
0.02739	-5.19021	0.157311
0.02495	-5.32482	0.150361
0.02273	-5.45926	0.143658
0.02071	-5.59353	0.137262
0.01886	-5.72853	0.131112
0.01718	-5.86313	0.125085
0.01565	-5.99769	0.119119
0.01426	-6.13188	0.113154
0.01299	-6.26645	0.10725
0.01183	-6.40141	0.101469
0.01078	-6.5355	0.0958722
0.009819	-6.67021	0.0904602
0.008944	-6.80486	0.0852942
0.008148	-6.93934	0.0804357
0.007422	-7.07398	0.0758232
0.006761	-7.20855	0.0714567
0.006159	-7.34309	0.0673363
0.005611	-7.47753	0.0634618
0.005111	-7.61218	0.0597718
0.004656	-7.74669	0.0562663
0.004241	-7.88138	0.0529453
0.003863	-8.01606	0.0498088
0.003519	-8.15062	0.0468568
0.003206	-8.28501	0.0440278
0.00292	-8.41982	0.0413218
0.00266	-8.55436	0.0387388
0.002423	-8.68899	0.0362788
0.002208	-8.82304	0.0338803
0.002011	-8.95787	0.0315433
0.001832	-9.09236	0.0292678
0.001669	-9.2268	0.0270538
0.00152	-9.36171	0.0249013
0.001385	-9.4959	0.0227488
0.001261	-9.63122	0.0205963
0.001149	-9.76541	0.0184438
0.001047	-9.89952	0.0163528
0.000954	-10.0337	0.0142618
0.000869	-10.1684	0.0122323
0.000791	-10.304	0.0102643
0.000721	-10.4377	0.00835784
0.000657	-10.5718	0.00663584
0.000598	-10.7076	0.00503684
0.000545	-10.8415	0.00362234
0.000496	-10.9774	0.00239235
0.000452	-11.1114	0.00140835
0.000412	-11.2451	0.000731849
0.000375	-11.3808	0.00026445

## Sheet: BRC3
Site BRC3						Fraction > 10 mm sieved in the field; fragments larger than 80 mm weighed individually.
Soil						Fraction < 10 mm sampled (~1-2 kg).
Easting	Northing					Fraction 1-10 mm sieved in the lab.
645652	4.3901e+06					Fraction < 1 mm characterised using a Malvern laser grain size analyser.
Total sample mass = 211.7 kg
Cumulative grain size data
Grain size
mm	-phi	% mass finer than…
148.85	7.21771	1.0001
81.325	6.34563	0.978085
75.1628	6.23195	0.974495
65.6608	6.03696	0.97166
55.3804	5.7913	0.969771
55.3804	5.7913	0.968637
53.7973	5.74946	0.967503
53.7973	5.74946	0.966464
52.115	5.70363	0.965425
48.3793	5.59632	0.96448
46.2731	5.5321	0.963724
43.9555	5.45797	0.963063
40	5.32193	0.962496
20	4.32193	0.945961
10	3.32193	0.918467
8	3	0.904072
5.6	2.48543	0.859885
4	2	0.817275
2.8	1.48543	0.768283
2	1	0.707296
1.4	0.485427	0.637812
1.041	0.0579701	0.566295
0.9483	-0.0765846	0.559945
0.8639	-0.211064	0.552762
0.7869	-0.345748	0.545551
0.7169	-0.480156	0.538826
0.653	-0.614845	0.532441
0.5949	-0.749281	0.525707
0.5419	-0.883901	0.517676
0.4936	-1.01859	0.507458
0.4497	-1.15297	0.494881
0.4096	-1.28771	0.480864
0.3731	-1.42237	0.467045
0.3399	-1.55682	0.455001
0.3096	-1.69152	0.445334
0.2821	-1.82572	0.437554
0.2569	-1.96072	0.430457
0.2341	-2.0948	0.422663
0.2132	-2.22972	0.413054
0.1942	-2.36438	0.401118
0.1769	-2.49899	0.387206
0.1612	-2.63308	0.372154
0.1468	-2.76808	0.356797
0.1337	-2.90293	0.341651
0.1218	-3.03741	0.326946
0.111	-3.17137	0.312765
0.1011	-3.30615	0.299221
0.0921	-3.44066	0.286341
0.0839	-3.57519	0.274124
0.07643	-3.70972	0.26257
0.06962	-3.84435	0.251563
0.06342	-3.97892	0.241045
0.05777	-4.11354	0.231018
0.05263	-4.24797	0.221453
0.04794	-4.38263	0.212321
0.04367	-4.51721	0.203593
0.03978	-4.65181	0.19521
0.03624	-4.78627	0.187117
0.03301	-4.92095	0.179254
0.03007	-5.05553	0.171564
0.02739	-5.19021	0.164104
0.02495	-5.32482	0.156901
0.02273	-5.45926	0.149957
0.02071	-5.59353	0.143299
0.01886	-5.72853	0.136815
0.01718	-5.86313	0.130473
0.01565	-5.99769	0.124188
0.01426	-6.13188	0.117904
0.01299	-6.26645	0.111677
0.01183	-6.40141	0.105565
0.01078	-6.5355	0.0995964
0.009819	-6.67021	0.0938851
0.008944	-6.80486	0.0884038
0.008148	-6.93934	0.0831804
0.007422	-7.07398	0.0782445
0.006761	-7.20855	0.0735664
0.006159	-7.34309	0.069146
0.005611	-7.47753	0.0649557
0.005111	-7.61218	0.0609657
0.004656	-7.74669	0.0572058
0.004241	-7.88138	0.053646
0.003863	-8.01606	0.0502589
0.003519	-8.15062	0.0470443
0.003206	-8.28501	0.0439724
0.00292	-8.41982	0.0410731
0.00266	-8.55436	0.0383165
0.002423	-8.68899	0.035675
0.002208	-8.82304	0.0331484
0.002011	-8.95787	0.030737
0.001832	-9.09236	0.0284107
0.001669	-9.2268	0.0261718
0.00152	-9.36171	0.0239903
0.001385	-9.4959	0.0218366
0.001261	-9.63122	0.0197404
0.001149	-9.76541	0.0176442
0.001047	-9.89952	0.0156056
0.000954		0.0135946
0.000869		0.0116411
0.000791		0.00974517
0.000721		0.00796426
0.000657		0.00629838
0.000598		0.00480505
0.000545		0.00345446
0.000496		0.00230624
0.000452		0.00135827
0.000412		0.000697879
0.000375		0.000249882

## Sheet: BRC0
Site BRC0						Fraction > 10 mm sieved in the field; fragments larger than 80 mm weighed individually.
Soil						Fraction < 10 mm sampled (~1-2 kg).
Easting	Northing					Fraction 1-10 mm sieved in the lab.
645650	4.39005e+06					Fraction < 1 mm characterised using a Malvern laser grain size analyser.
Total sample mass = 189.0 kg
Cumulative grain size data
Grain size
mm	-phi	% mass finer than…
79.1259	6.30608	1.00023
75.1628	6.23195	0.996524
53.7973	5.74946	0.993349
43.9555	5.45797	0.992185
40	5.32193	0.991551
20	4.32193	0.987265
10	3.32193	0.98118
8	3	0.980332
5.6	2.48543	0.965208
4	2	0.942435
2.8	1.48543	0.903439
2	1	0.840378
1.4	0.485427	0.761587
1.041	0.0579701	0.685256
0.9483	-0.0765846	0.679553
0.8639	-0.211064	0.672536
0.7869	-0.345748	0.664966
0.7169	-0.480156	0.657396
0.653	-0.614845	0.649791
0.5949	-0.749281	0.641495
0.5419	-0.883901	0.631506
0.4936	-1.01859	0.618924
0.4497	-1.15297	0.603611
0.4096	-1.28771	0.586536
0.3731	-1.42237	0.569529
0.3399	-1.55682	0.554251
0.3096	-1.69152	0.541427
0.2821	-1.82572	0.530574
0.2569	-1.96072	0.520377
0.2341	-2.0948	0.509419
0.2132	-2.22972	0.496423
0.1942	-2.36438	0.480972
0.1769	-2.49899	0.463378
0.1612	-2.63308	0.444471
0.1468	-2.76808	0.42508
0.1337	-2.90293	0.405792
0.1218	-3.03741	0.386989
0.111	-3.17137	0.368773
0.1011	-3.30615	0.351283
0.0921	-3.44066	0.334692
0.0839	-3.57519	0.318999
0.07643	-3.70972	0.304136
0.06962	-3.84435	0.290034
0.06342	-3.97892	0.276588
0.05777	-4.11354	0.263799
0.05263	-4.24797	0.251632
0.04794	-4.38263	0.240088
0.04367	-4.51721	0.22913
0.03978	-4.65181	0.218726
0.03624	-4.78627	0.208772
0.03301	-4.92095	0.199232
0.03007	-5.05553	0.190072
0.02739	-5.19021	0.181293
0.02495	-5.32482	0.172894
0.02273	-5.45926	0.164909
0.02071	-5.59353	0.157305
0.01886	-5.72853	0.149977
0.01718	-5.86313	0.142857
0.01565	-5.99769	0.13584
0.01426	-6.13188	0.128927
0.01299	-6.26645	0.122118
0.01183	-6.40141	0.115481
0.01078	-6.5355	0.109087
0.009819	-6.67021	0.102969
0.008944	-6.80486	0.0971619
0.008148	-6.93934	0.0916315
0.007422	-7.07398	0.0863777
0.006761	-7.20855	0.0814003
0.006159	-7.34309	0.0766995
0.005611	-7.47753	0.0722406
0.005111	-7.61218	0.0679891
0.004656	-7.74669	0.0639796
0.004241	-7.88138	0.0601775
0.003863	-8.01606	0.0565481
0.003519	-8.15062	0.0530917
0.003206	-8.28501	0.049808
0.00292	-8.41982	0.0466626
0.00266	-8.55436	0.0436554
0.002423	-8.68899	0.0407866
0.002208	-8.82304	0.0380214
0.002011	-8.95787	0.0353599
0.001832	-9.09236	0.0327675
0.001669	-9.2268	0.0302443
0.00152	-9.36171	0.0277902
0.001385	-9.4959	0.0253361
0.001261	-9.63122	0.0229165
0.001149	-9.76541	0.020497
0.001047	-9.89952	0.0181466
0.000954	-10.0337	0.0158307
0.000869	-10.1684	0.0135494
0.000791	-10.304	0.0113719
0.000721	-10.4377	0.00929796
0.000657	-10.5718	0.00736233
0.000598	-10.7076	0.00559952
0.000545	-10.8415	0.00400953
0.000496	-10.9774	0.0026615
0.000452	-11.1114	0.00155542
0.000412	-11.2451	0.000812275
0.000375	-11.3808	0.000293802

## Sheet: BRB8-9h
Site BRB8-9h						Fraction > 10 mm sieved in the field; fragments larger than 80 mm weighed individually.
Soil						Fraction < 10 mm sampled (~1-2 kg).
Easting	Northing					Fraction 1-10 mm sieved in the lab.
645598	4390101					Fraction < 1 mm characterised using a Malvern laser grain size analyser.
Total sample mass = 63.8 kg
Cumulative grain size data
Grain size
mm	-phi	% mass finer than…
77	6.26679	1
40	5.32193	0.973342
20	4.32193	0.944803
10	3.32193	0.886157
8	3	0.85787
5.6	2.48543	0.808905
4	2	0.754398
2	1	0.616933
1.4	0.485427	0.538771
1.041	0.0579701	0.471361
0.961542	-0.0565784	0.471361
0.851056	-0.232675	0.460429
0.753265	-0.408771	0.445324
0.666711	-0.584868	0.428559
0.590102	-0.760964	0.41103
0.522296	-0.93706	0.393229
0.462281	-1.11316	0.375639
0.409163	-1.28925	0.358606
0.362148	-1.46535	0.342301
0.320535	-1.64145	0.32675
0.283704	-1.81754	0.311862
0.251105	-1.99364	0.297468
0.222251	-2.16974	0.283367
0.196714	-2.34583	0.269364
0.17411	-2.52193	0.2553
0.154104	-2.69802	0.241072
0.136397	-2.87412	0.226636
0.120724	-3.05022	0.212021
0.106852	-3.22631	0.19732
0.0945742	-3.40241	0.182683
0.0837071	-3.57851	0.168294
0.0740887	-3.7546	0.154341
0.0655755	-3.9307	0.140995
0.0580405	-4.1068	0.128388
0.0513714	-4.28289	0.116606
0.0454685	-4.45899	0.105693
0.0402439	-4.63508	0.0956523
0.0356197	-4.81118	0.086449
0.0315268	-4.98728	0.078033
0.0279042	-5.16337	0.0703455
0.0246979	-5.33947	0.0633273
0.0218599	-5.51557	0.0569233
0.0193481	-5.69166	0.05109
0.0171249	-5.86776	0.045784
0.0151572	-6.04386	0.0409721
0.0134155	-6.21995	0.0366252
0.011874	-6.39605	0.032715
0.0105096	-6.57215	0.0292118
0.00930201	-6.74824	0.0260848
0.00823316	-6.92434	0.0232964
0.00728712	-7.10043	0.0208084
0.0064498	-7.27653	0.0185833
0.00570868	-7.45263	0.0165861
0.00505272	-7.62872	0.0147868
0.00447214	-7.80482	0.0131624
0.00395826	-7.98092	0.011695
0.00350344	-8.15701	0.0103732
0.00310087	-8.33311	0.00919028
0.00274457	-8.50921	0.00814265
0.0024292	-8.6853	0.00722675
0.00215007	-8.8614	0.00643718
0.00190302	-9.0375	0.00576362
0.00168435	-9.21359	0.0051872
0.00149081	-9.38969	0.00467794
0.00131951	-9.56578	0.00419756
0.00116789	-9.74188	0.00370804
0.00103369	-9.91798	0.00318193
0.000914916	-10.0941	0.00261051
0.000809787	-10.2702	0.00200629
0.000716738	-10.4463	0.00140489
0.000634381	-10.6224	0.000839678
0.000561487	-10.7985	0.000376882
0.000496969	-10.9746	4.26346e-05
0.000439865	-11.1507	0
0.000389322	-11.3267	0
0.000344587	-11.5028	0

## Sheet: LD1
Site LD1						Fraction > 10 mm sieved in the field; fragments larger than 80 mm weighed individually.
Landslide						Fraction < 10 mm sampled (~1-2 kg).
Easting	Northing					Fraction < 10 mm sieved in the lab.
645654	4390634
Total sample mass = 84.8 kg
Cumulative grain size data
Grain size
mm	-phi	% mass finer than…
176.767	7.46571	1
171.537	7.42238	0.909722
144.45	7.17443	0.827222
131.032	7.03377	0.777958
102.191	6.67512	0.741186
92.0025	6.5236	0.723743
91.4311	6.51461	0.711015
90.2662	6.49611	0.698522
85.2756	6.41406	0.686501
80	6.32193	0.676365
40	5.32193	0.524801
20	4.32193	0.397516
10	3.32193	0.310302
8	3	0.285781
5.6	2.48543	0.263665
4	2	0.241751
2	1	0.222432
1.4	0.485427	0.197956
1	0	0.175608

## Sheet: LD2
Site LD2						Fraction > 10 mm sieved in the field; fragments larger than 80 mm weighed individually.
Landslide						Fraction < 10 mm sampled (~1-2 kg).
Easting	Northing					Fraction < 10 mm sieved in the lab.
645643	4390887
Total sample mass = 113.3 kg
Cumulative grain size data
Grain size
mm	-phi	% mass finer than…
189.249	7.56414	1
148.046	7.2099	0.917027
142.819	7.15804	0.877306
139.44	7.1235	0.841646
122.989	6.94238	0.808456
114.467	6.83879	0.785683
106.601	6.73608	0.767323
103.554	6.69423	0.752494
103.103	6.68795	0.738901
94.2203	6.55797	0.725484
94.2203	6.55797	0.715245
93.1246	6.54109	0.705005
93.1246	6.54109	0.695119
92.0025	6.5236	0.685233
92.0025	6.5236	0.6757
92.0025	6.5236	0.666167
89.6724	6.48659	0.656634
88.4604	6.46696	0.647807
88.4604	6.46696	0.639333
87.2143	6.44649	0.630859
87.2143	6.44649	0.622739
86.5777	6.43592	0.614618
85.2756	6.41406	0.606674
85.2756	6.41406	0.599083
85.2756	6.41406	0.591492
83.9324	6.39116	0.5839
82.5449	6.36711	0.576662
81.109	6.34179	0.569777
80.3716	6.32861	0.563245
80	6.32193	0.55689
40	5.32193	0.349282
20	4.32193	0.267368
10	3.32193	0.224469
8	3	0.213712
5.6	2.48543	0.201994
4	2	0.186741
2	1	0.167503
1.4	0.485427	0.145756
1	0	0.128905

[truncated: 1 more sheets: LD3]
